# Supplementary material
Source: publisher site journal article supplement (https://www.dovepress.com/article/526194)

Supplementary Table 1 Database and Search strategy

| **Database** | **Search strategy** |
| --- | --- |
| **Pubmed**  **(n=632)** | #1: ((((pulmonary disease, chronic obstructive[MeSH Terms]) OR (pulmonary disease, chronic obstructive[Title/Abstract])) OR (chronic obstructive pulmonary disease[Title/Abstract])) OR (COPD[Title/Abstract])) OR (chronic obstructive lung disease[Title/Abstract]) |
| #2: ((((((((exacerbation[Title/Abstract]) OR (progression[Title/Abstract])) OR (progressive[Title/Abstract])) OR (death[Title/Abstract])) OR (deceased[Title/Abstract])) OR (mortality[Title/Abstract])) OR (survival[Title/Abstract])) OR (poor prognosis[Title/Abstract])) OR (poor outcome[Title/Abstract]) |
| #3: (((body mass index[MeSH Terms]) OR (fat free mass index[Title/Abstract])) OR (fat free[Title/Abstract])) OR (FFMI[Title/Abstract]) |
| #4:#1 AND #2 AND #3 = **632** items |
| **Embase**  **(n=268)** | #1: 'chronic obstructive lung disease'/exp OR 'pulmonary disease, chronic obstructive':ab,ti OR 'COPD':ab,ti |
| #2: 'death':ab,ti OR 'mortality':ab,ti OR 'deceased':ab,ti OR 'progressive':ab,ti OR 'progression':ab,ti OR 'exacerbation':ab,ti OR 'survival':ab,ti OR 'poor prognosis':ab,ti OR 'poor outcome':ab,ti |
| #3: 'fat free mass index':ab,ti OR 'fat free':ab,ti OR 'FFMI':ab,ti |
| #4:#1 AND #2 AND #3 = **268** items |
| **Cochrane library**  **(n=105)** | #1: (pulmonary disease, chronic obstructive):MeSH OR (COPD):ab,ti,kw OR (chronic obstructive pulmonary disease):ab,ti,kw |
| #2: (body mass index):MeSH OR (fat free mass index):ab,ti,kw OR (fat free):ab,ti,kw OR (FFMI):ab,ti,kw |
| #3: (death):ab,ti,kw OR (mortality):ab,ti,kw OR (progressive):ab,ti,kw OR(progression):ab,ti,kw OR (exacerbation):ab,ti,kw OR (deceased):ab,ti,kw OR (survival):ab,ti,kw OR (poor prognosis):ab,ti,kw OR (poor outcome):ab,ti,kw |
| #4:#1 AND #2 AND #3 =**105** items |
| **Web of science**  **(n=229)** | #1: TS=(COPD OR chronic obstructive pulmonary disease) |
| #2: TS=(FFMI OR fat free mass index) |
| #3: TS=(death OR mortality OR progressive OR progression OR exacerbation OR deceased OR survival OR poor prognosis OR poor outcome) |
| #4:#1 AND #2 AND #3 =**229** items |
| **Scopus**  **(n=77)** | #1: TITLE-ABS-KEY ("COPD" OR "chronic obstructive pulmonary disease") |
| #2: TITLE-ABS-KEY ("FFMI" OR "fat free mass index") |
| #3: TITLE-ABS-KEY ("death" OR "mortality" OR "progressive" OR "progression" OR "deceased" OR "survival" OR "poor prognosis" OR "poor outcome") |
| #4:#1 AND #2 AND #3 =**77** items |
| **Ovid**  **(n=78)** | #1: (COPD OR chronic obstructive pulmonary disease).ti,ab,kw |
| #2: (FFMI OR fat free mass index).ti,ab,kw |
| #3: (death OR mortality OR progressive OR progression OR exacerbation OR deceased OR survival OR poor prognosis OR poor outcome).ti,ab,kw |
| #4:#1 AND #2 AND #3 =**78** items |

Supplementary Table 2 Characteristics of each included study related to COPD and the control groups (non-SC and SC)

| **No** | **Author, Year** | **Country** | **Study type** | **Comparative**  **Group** | **Age**  **(year)** | **Male**  **n (%**) | **Smoker^**  **n (%**) | **BMI**  **(kg/m2)** | **FEV1%** | **FEV1/FVC%** | **Sample Size**  **(n)** | FFMI  Mean ± **SD**  **(kg/m2)** |
| --- | --- | --- | --- | --- | --- | --- | --- | --- | --- | --- | --- | --- |
| 1 | Jin X et al, 2024 [16] | China | observational | COPD | 69.71 ± 9.23 | 84(80) | 63(60) | 23.22 ± 4.34 | 51.59 ± 18.49 | 58.42 ± 12.68 | 105 | 16.72 ± 2.13 |
| non-SC | 68.06 ± 3.58 | 75(71.40) | NA | 25.00 ± 5.15 | NA | NA | 105 | 18.64 ± 3.26 |
| 2 | Sanchez FF et al, 2011 [17] | Brazil | cross-sectional | COPD | 64.6 ± 9.3 | 38(69.1) | NA | 25.4 ± 5.1 | 54.5 ± 22.7 | 49.0 (38.0-61.7) | 55 | 15.9 ± 2.2 |
| non-SC | 48.2 ± 6.9 | 10(23.5) | NA | 26.3 ± 3.5 | 112.0 ± 14.7 | 83.0 (81.2-88.0) | 23 | 17.2 ± 2.0 |
| 3 | Rutten EP et al, 2013 [19] | ECLIPSE  study | prospective | COPD | 64 (59–69) | 1375(65) | NA | 26.0 (22.7–29.6) | 43.5 (32.3–55.0) | 58.0 (47.7–69.6) | 2115 | 17.97±2.37# |
| SC | 55 (48–62) | 183(56) | 327(100) | 26.2 (23.7–29.0) | 103.3 (96.0–113.0) | 97.7 (93.0–103.4) | 327 | 18.02±2.46# |
| 4 | Minas M et al, 2010 [20] | Greece | cross-sectional | COPD | 70(65–77) | 49(69) | 71(100) | 27.0(25.2–30.9) | 57.1 ± 8.6 | 57.7 ± 11.3 | 71 | 21.16±3.56# |
| SC | 56(49–69) | 58(82.9) | 70(100) | 28.5(26.5–31.1) | 97.7 ± 11.8 | 79.4 ± 4.9 | 70 | 21.96±2.42# |
| 5 | Albarrati AM et al, 2020 [18] | UK | cross-sectional | COPD | 66 ± 8 | 46(52.3) | NA | 27.5 ± 5.2 | 56 ± 17 | 52 ± 10 | 88 | 18.2 ± 2.4 |
| SC | 66 ± 7 | 19(47.5) | NA | 28.6 ± 4.9 | 106 ± 17 | 78 ± 5 | 40 | 18.5 ± 2.1 |

#: Estimating the sample mean±SD; **^**: Current or ex-smoker; NA: not applicable; BMI: body mass index; FEV1: forced expiratory volume in the first second; FVC: forced vital capacity; FFMI: fat-free mass index; SD: standard deviation; COPD: chronic obstructive pulmonary disease; SC: Smoking control.

Supplementary Table 3 Characteristics associated with AECOPD in each included study

| **No** | **Author, Year** | **Country** | **Study type** | **Comparative**  **Group** | **Age**  **(year)** | **Male**  **n (%**) | **Smoker^**  **n (%**) | **BMI**  **(kg/m2)** | **FEV1%** | **FEV1/FVC%** | **Sample Size**  **(n)** | FFMI | |
| --- | --- | --- | --- | --- | --- | --- | --- | --- | --- | --- | --- | --- | --- |
| Mean ± **SD**  **(kg/m2)** | OR (95% CI)  (Univariate) |
| 1 | Motegi T et al, 2013 [22] | Japan | prospective | AE | 72.5 ± 9.1 | 62(96.9) | 3(4.7)^ | 21.9 ± 2.5 | 47.8 ± 18.1 | NA | 64 | 16.7 ± 1.4 | 0.86 (0.71-1.04) |
| non-AE | 70.8 ± 8.5 | 108(90.8) | 5(4.2) ^ | 22.4 ± 3.4 | 59.9 ± 20.9 | NA | 119 | 17.1 ± 1.8 |
| 2 | Karanikas I et al, 2021 [21] | Greece | prospective | AE | 69.3 ± 8.9 | 24(47.0) | 32(69.6) | 24.7 ± 4.8 | 48.5 ± 17.4 | NA | 51 | 17.2 ± 3.9 | 0.762 (0.614-0.946) |
| non-AE | 63.5 ± 8.7 | 12(48.0) | 10(100.0) | 29.9 ± 3.8 | 62.6 ± 20.9 | NA | 25 | 20.8 ± 1.9 |
| 3 | Faganello MM et al, 2010 [23] | Brazil | prospective | AE | 66.0 ± 10.2 | 41(68.3) | 19(31.7) | 25.6 ± 5.9 | 53.7 ± 24.3 | NA | 60 | 16.0 ± 2.2 | NA |
| non-AE | 55 (48–62) | 44(73.3) | 16(26.7) | 26.3 ± 5.4 | 66.7 ± 24.2 | NA | 60 | 16.4 ± 1.8 |
| 4 | Yang L et al, 2019 [24] | China | retrospective | AE | NA | NA | NA | NA | NA | NA | 23 | NA | 0.589 (0.129–2.679) |
| non-AE | NA | NA | NA | NA | NA | NA | 68 | NA |
| 4 | Yang L et al, 2019 [24] | China | prospective | AE | NA | NA | NA | NA | NA | NA | 17 | NA | 1.768 (0.584–5.349) |
| non-AE | NA | NA | NA | NA | NA | NA | 50 | NA |

#: Estimating the sample mean±SD; **^**: Current or ex-smoker; NA: not applicable; BMI: body mass index; FEV1: forced expiratory volume in the first second; FVC: forced vital capacity; FFMI: fat-free mass index; SD: standard deviation; OR: odds ratio; CI: confidence interval; AECOPD: acute exacerbation of chronic obstructive pulmonary disease.

Supplementary Table 4 Characteristics associated with COPD death in each included study

| **No** | **Author, Year** | **Country** | **Study type** | **Comparative**  **Group** | **Age**  **(year)** | **Male**  **n (%**) | **Smoker^**  **n (%**) | **BMI**  **(kg/m2)** | **FEV1%** | **FEV1/FVC%** | **Sample Size**  **(n)** | FFMI | |
| --- | --- | --- | --- | --- | --- | --- | --- | --- | --- | --- | --- | --- | --- |
| Mean ± **SD**  **(kg/m2)** | HR (95% CI)  (Univariate) |
| 1 | de Blasio F et al, 2019 [12] | Italy | prospective | Survival | 68.9 ± 8.0 | 126(69.6) | NA | 26.2 ± 5.4 | 41.0 ± 16.0 | 55.0 ± 8.1 | 181 | 17.8 ± 2.2 | 0.86 (0.72-1.02) |
| Death | 72.4 ± 8.3 | 19 (65.5) | NA | 23.8 ± 6.4 | 36.0 ± 23.9 | 55.4 ± 7.0 | 29 | 17.0 ± 2.7 |
| 2 | Maters GA et al, 2014 [26] | Brazil | prospective | Survival | 57.7 ± 8.9 | 50(45.5) | 44(40.0) | 26.5 ± 7.0 | 43.2 ± 16.3 | NA | 110 | 19.9 ± 4.9 | 0.92 (0.89-0.99) |
| Death | 65.2 ± 9.8 | 66(57.9) | 38(33.3) | 25.8 ± 6.3 | 37.8 ± 14.1 | NA | 114 | 17.8 ± 3.9 |
| 3 | Waschki B et al, 2011 [27] | Germany | prospective | Survival | 63.6 ± 6.6 | 107(74.8) | 62(43.4) | 26.7 ± 5.1 | 58.8 ± 21.1 | NA | 143 | 18.9 ± 2.6 | 0.82 (0.70-0.97) |
| Death | 66.1 ± 6.4 | 20(76.9) | 9(34.6) | 23.5 ± 4.3 | 41.4 ± 21.9 | NA | 26 | 17.6 ± 2.4 |
| 4 | Coleta KD et al, 2008 [28] | Brazil | prospective | Survival | 65.6 ± 9.1 | NA | NA | 25.1 ± 6.9 | 41.7 ± 16.8 | 47.1 ± 11.1 | 66 | 16.1 ± 3.2 | NA |
| Death | 68.2 ± 7.9 | NA | NA | 23.7 ± 5.2 | 35.4 ± 10.9 | 46.6 ± 12.3 | 12 | 15.1 ± 2.4 |
| 5 | Schols AM et al, 2005 [30] | Netherland | prospective | Survival | NA | NA | NA | NA | NA | NA | 223 | NA | 0.88 (0.83-0.94) |
| Death | NA | NA | NA | NA | NA | NA | 189 | NA |
| 6 | Slinde F et al, 2005 [11] | Sweden | prospective | Survival | 63.6 ± 7.0 | 23(59.0) | 14(36) | 23.5 ± 3.5 | 39 ± 11 | NA | 39 | 17.3 ± 2.4 | 0.88 (0.77–1.01) |
| Death | 67.7 ± 5.6 | 19(40.0) | 11(23) | 22.3 ± 4.4 | 31 ± 10 | NA | 47 | 16.3 ± 2.2 |
| 7 | Pison CM et al, 2011 [29] | France; | prospective | Survival | NA | NA | NA | NA | NA | NA | 48 | NA | 0.831(0.654-1.055) |
| Death | NA | NA | NA | NA | NA | NA | 3 | NA |
| 8 | Perrot L et al, 2020 [25] | France | prospective | Survival | 65 ± 10 | 19(63) | NA | 28.3 ± 7.6 | 50 ± 15 | NA | 30 | 18.2 ± 3.9 | NA |
| Death | 72 ± 10 | 7(88) | NA | 22.6 ± 9.7 | 37 ± 20 | NA | 8 | 15.1 ± 9.6 |

#: Estimating the sample mean±SD; **^**: Current or ex-smoker; NA: not applicable; BMI: body mass index; FEV1: forced expiratory volume in the first second; FVC: forced vital capacity; FFMI: fat-free mass index; SD: standard deviation; HR: hazard ratio; CI: confidence interval; COPD: chronic obstructive pulmonary disease.

Supplementary Table 5 Results of Newcastle-Ottawa quality assessment Scale for each included study

| **Study** | **Selection** | **Comparability** | **Outcome** | **Total** |
| --- | --- | --- | --- | --- |
| Jin X et al, 2024 | **★★★★** | **★★** | **★★** | 8**★** |
| Sanchez FF et al, 2011 | **★★★★** | **★** | **★★** | 7**★** |
| Rutten EP et al, 2013 | **★★★★** | **★** | **★★★** | 8**★** |
| Minas M et al, 2010 | **★★★** | **★** | **★★** | 6**★** |
| Albarrati AM et al, 2020 | **★★★★** | **★★** | **★★★** | 9**★** |
| Motegi T et al, 2013 | **★★★★** | **★★** | **★★** | 8**★** |
| Karanikas I et al, 2021 | **★★★★** | **★** | **★★★** | 8**★** |
| Faganello MM et al, 2010 | **★★★★** | **★★** | **★★★** | 9**★** |
| Yang L et al, 2019 | **★★★★** |  | **★★★** | 7**★** |
| de Blasio F et al, 2019 | **★★★★** | **★** | **★★** | 7**★** |
| Maters GA et al, 2014 | **★★★★** | **★** | **★★★** | 8**★** |
| Waschki B et al, 2011 | **★★★★** | **★★** | **★★★** | 9**★** |
| Coleta KD et al, 2008 | **★★★★** | **★★** | **★★★** | 9**★** |
| Schols AM et al, 2005 | **★★★★** |  | **★★** | 6**★** |
| Slinde F et al, 2005 | **★★★★** | **★** | **★★** | 7**★** |
| Pison CM et al, 2011 | **★★★★** |  | **★★★** | 7**★** |
| Perrot L et al, 2020 | **★★★★** | **★★** | **★★** | 8**★** |

Supplementary Figure 1 Plot for the assessment of heterogeneity in included studies (COPD vs control [non-SC and SC]) through One-by-one elimination method.


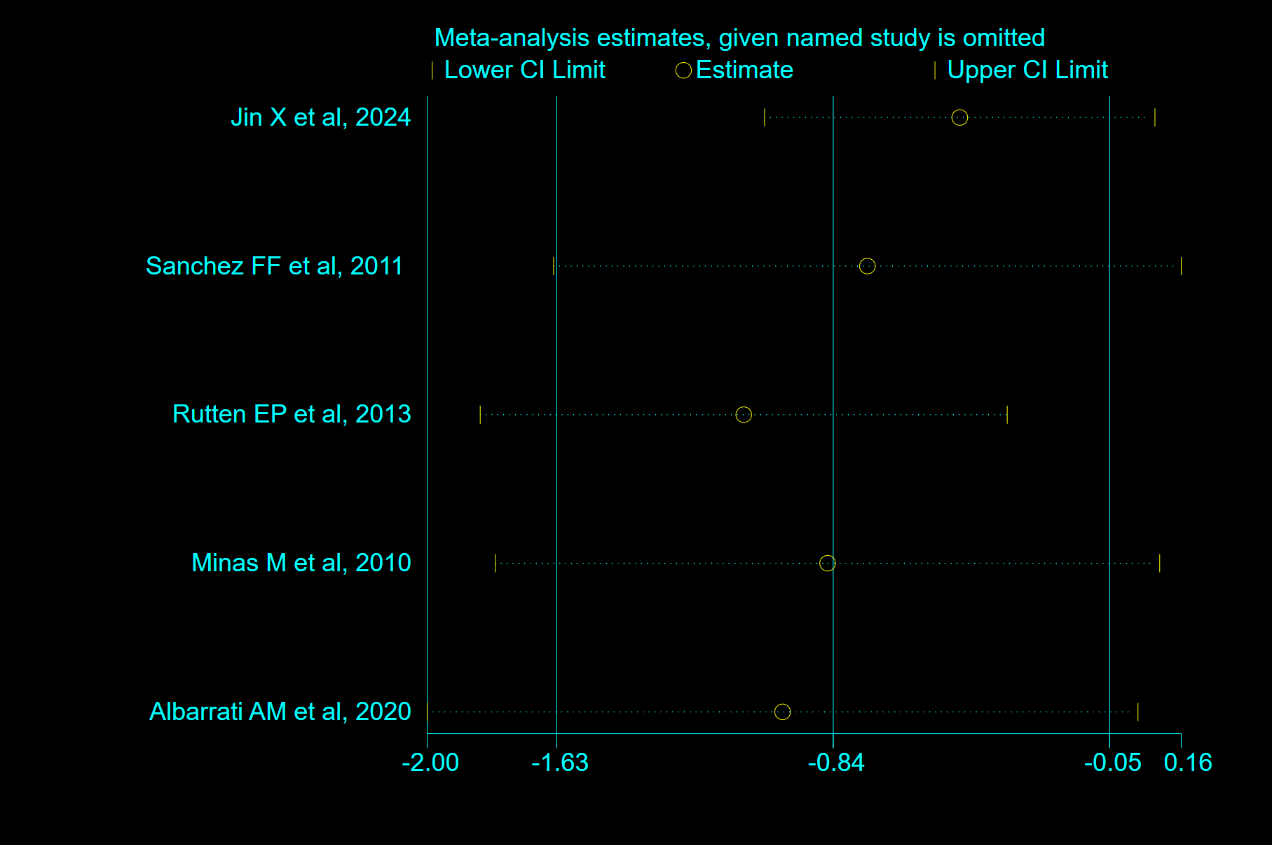


Supplementary Figure 2 Plot for the assessment of heterogeneity in included studies (non-AE vs AE) through One-by-one elimination method.


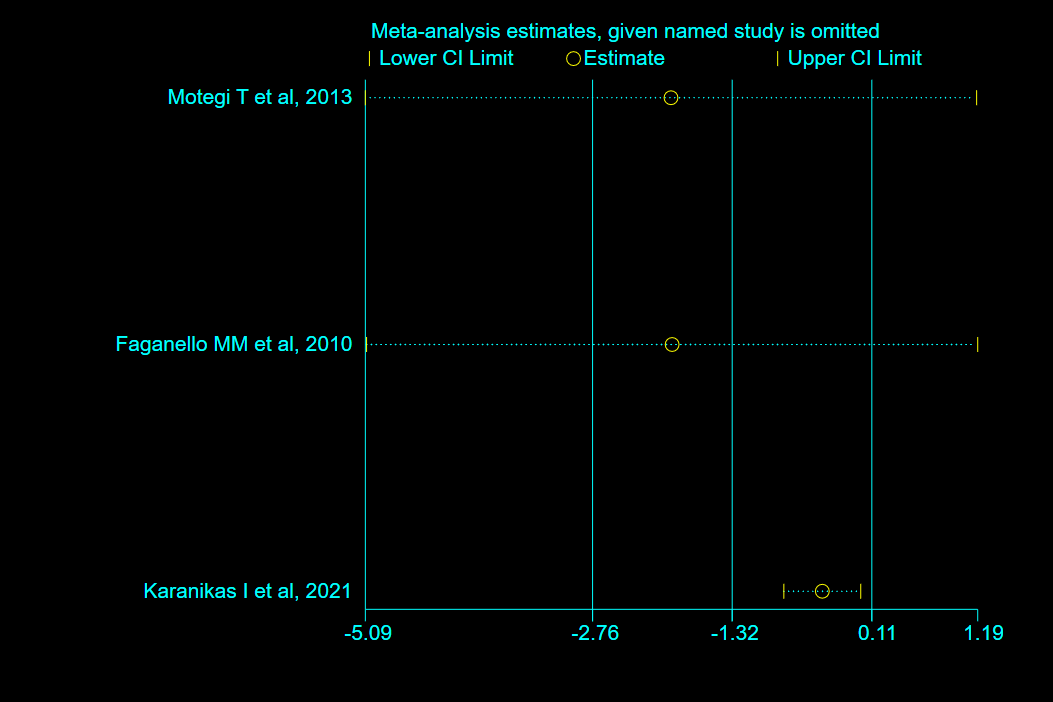


Supplementary Figure 3 Plot for the assessment of heterogeneity in included studies (OR associated with AE) through One-by-one elimination method.


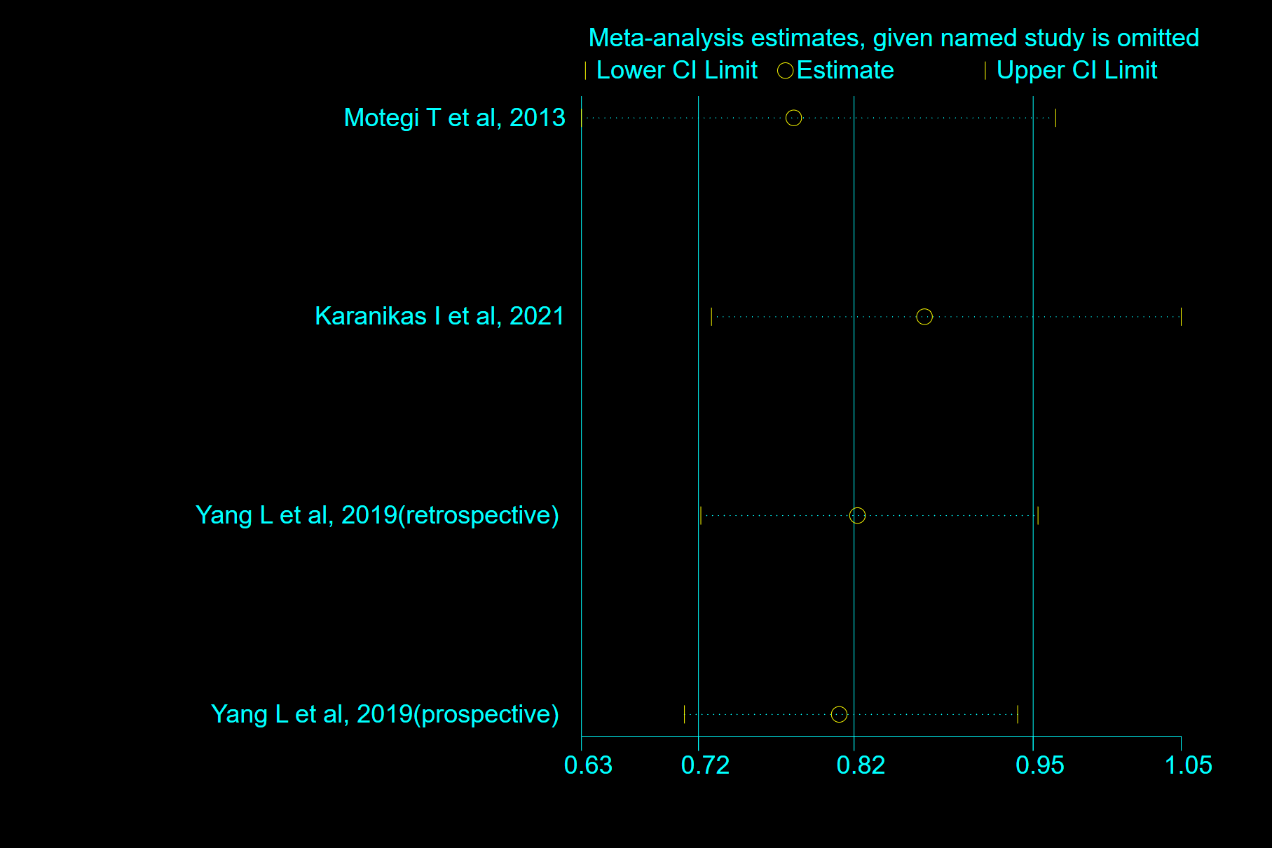


Supplementary Figure 4 Plot for the assessment of heterogeneity in included studies (survival vs death) through One-by-one elimination method


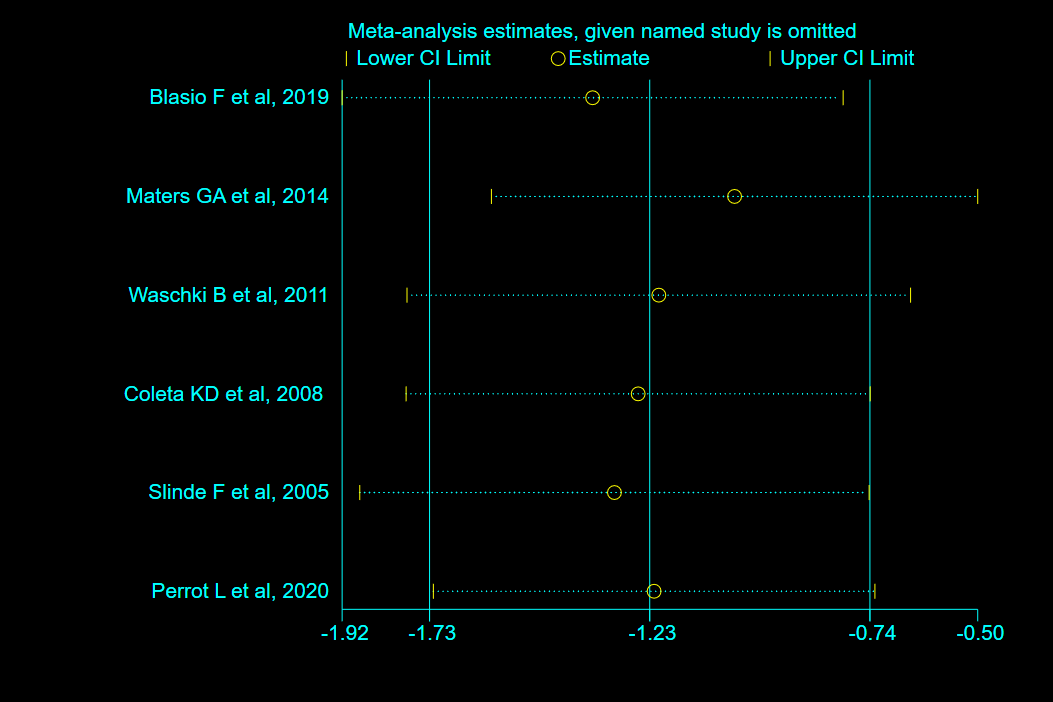


Supplementary Figure 5 Plot for the assessment of heterogeneity in included studies (HR associated with mortality) through One-by-one elimination method.


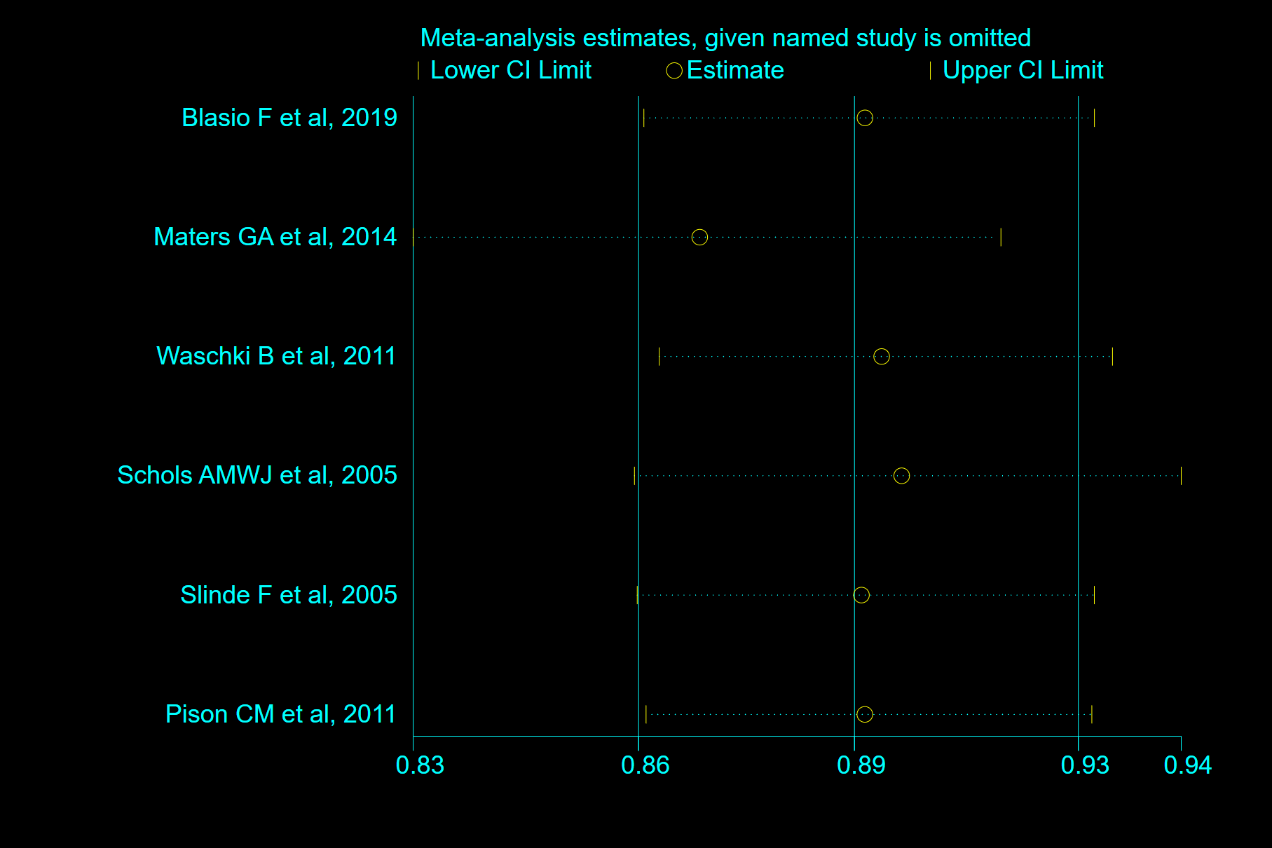

Supplement: Supplementary file 1 [file 526194%20Supplementary%20materials.docx]
